# Supplementary material for: A conserved bacterial protein induces pancreatic beta cell expansion during zebrafish development
Source: eLife. 2016 Dec 13;5:e20145. doi: 10.7554/eLife.20145 (PMC5154760; doi:10.7554/eLife.20145)
Supplement: Figure 1—source data 1. — Exact values of N, mean, median, SD, and SEM are reported in the source data file and are highlighted in yellow, magenta, blue, green, and cyan, respectively. DOI: http://dx.doi.org/10.7554/eLife.20145.004 [file elife-20145-fig1-data1.xlsx]

## Sheet: Sheet1
3 CV	3 GF	4 CV	4 GF	5 CV	5 GF	6 CV	6 GF
24	24	31	36	39	20	42	19
22	25	23	26	42	26	31	17
22	22	37	29	37	32	40	24
24	34	38	22	40	41	37	23
22	17		23	45	26	32	20
28	18		20		31	41	19
30	17				14	43	18
32	26				34	36	22
34	25					41	18
26	31					35	23
26	37					38	26
24	20					39	27
						30	38
						37	39
						29	32
						49	26
						54	45
						50	41
						57	28
						20	43
						35	31
						49	36
						54	16
						50	30
						57	30
						20	34
						35	25
						42	43
							30
							27
							13
12	12	4	6	5	8	28	31		N
26.1667	24.6667	32.25	26	40.6	28	40.1071	27.9375		mean
25	24.5	34	24.5	40	28.5	39.5	27		median
4.04145	6.55513	6.89807	5.83095	3.04959	8.43462	9.87079	8.76012		SD
1.16667	1.8923	3.44903	2.38048	1.36382	2.98209	1.8654	1.57336		SEM
Unit being measured: beta cells per larvae
Statistical Test: One way ANOVA with post hoc means testing (Tukey)
ANOVA values
F	9.01
DF	7
p	1.45e-08
