# Supplementary material for: A conserved bacterial protein induces pancreatic beta cell expansion during zebrafish development
Source: eLife. 2016 Dec 13;5:e20145. doi: 10.7554/eLife.20145 (PMC5154760; doi:10.7554/eLife.20145)
Supplement: Figure 1—source data 2. — Exact values of N, mean, median, SD, and SEM are reported in the source data file and are highlighted in yellow, magenta, blue, green, and cyan, respectively. DOI: http://dx.doi.org/10.7554/eLife.20145.005 [file elife-20145-fig1-data2.xlsx]

## Sheet: Sheet1
CV	GF
156.35	193.599
138.117	210.032
116.754	255.889
141.873	245.403
147.195	209.719
213.813	266.806
194.676	275.27
212.095	210.5
198.724	311.58
188.297	139.381
139.969	187.112
155.16
147.319
13	11		N
154.525	227.754		mean
155.16	210.5		median
31.8489	48.454		SD
8.83329	14.6094		SEM
Unit being measured: pmol of glucose per larvae
Statistical Test: Student's T test with equal variance assumptions
T test values:
t	-3.65
df	17
p	<0.01
