# Supplementary material for: A conserved bacterial protein induces pancreatic beta cell expansion during zebrafish development
Source: eLife. 2016 Dec 13;5:e20145. doi: 10.7554/eLife.20145 (PMC5154760; doi:10.7554/eLife.20145)
Supplement: Figure 2—source data 1. — Exact values of N, mean, median, SD, and SEM are reported in the source data file and are highlighted in yellow, magenta, blue, green, and cyan, respectively. DOI: http://dx.doi.org/10.7554/eLife.20145.007 [file elife-20145-fig2-data1.xlsx]

## Sheet: Sheet1
CV	GF	XGF	Aeromonas 1	Aeromonas 2	Aeromonas 3	Shewanella	Acinetobacter	Pseudomonas	Variovorax	* Vibrio	Enterobacter	Delftia
40	19	23	34	18	17	41	24	25	19	22	23	18
22	19	31	26	36	24	30	24	22	22	22	21	20
38	22	34	26	34	22	32	24	17	17	22	21	17
37	20	28	25	24	23	38	24	30	18	25	14	16
37	18	22	29	30	27	25	24	22	24	18	24	19
22	18	30	29	23	34	25	24	16	28	13	15	5
25	21	30	25	24	30	29	24	15	17	19	18	17
28	26	36	30	34	35	15	24	20			17
25	28	43	40	24	31	25	24	21
35	21	35	35	31	33	40		24
43	27	25	37	39				25
29	15	31	40	40				24
30	25	44	35	37
27	22	37	33	24
31	18	34
25	35	21
41	20
30	23
31	28
30	22
22	25
39	17
	22
	34
22	24	16	14	14	10	10	9	12	7	7	8	7		N
31.2273	22.7083	31.5	31.7143	29.8571	27.6	30	24	21.75	20.7143	20.1429	19.125	16		mean
30	22	31	31.5	30.5	28.5	29.5	24	22	19	22	19.5	17		median
6.57507	5.03448	6.81175	5.31223	6.99293	5.96657	8.09664	0	4.30908	4.15188	3.89138	3.68152	5.03322		SD
1.40181	1.02766	1.70294	1.41975	1.86894	1.8868	2.56038	0	1.24392	1.56926	1.4708	1.30161	1.90238		SEM
<0.01	NA	<0.01	<0.01	0.0149	0.5187	0.0427	1	1	0.9998	0.9976	0.9399	0.2303		Tukey p value (against GF)
Unit being measured: beta cells per larvae
Statistical Test: One way ANOVA with post hoc means testing (Tukey)
ANOVA values
F	10.2
DF	12
p	2.1e-14
