# Supplementary material for: A conserved bacterial protein induces pancreatic beta cell expansion during zebrafish development
Source: eLife. 2016 Dec 13;5:e20145. doi: 10.7554/eLife.20145 (PMC5154760; doi:10.7554/eLife.20145)
Supplement: Figure 3—source data 1. — Exact values of N, mean, median, SD, and SEM are reported in the source data file and are highlighted in yellow, magenta, blue, green, and cyan, respectively. DOI: http://dx.doi.org/10.7554/eLife.20145.009 [file elife-20145-fig3-data1.xlsx]

## Sheet: Sheet1
CV	GF	Aero. 1 CFS	Aero. 2 CFS	Aero. 3 CFS	* Vibrio CFS	Aero. 1 CFS + PK	Aero. 1ΔT2SS CFS
36	36	21	37	41	31	29	23
46	30	32	39	25	28	29	36
47	43	32	36	54	23	29	22
35	25	31	37	51	27	29	30
52	43	34	51	36	17	29	34
31	22	28	33	33	28	29	33
41	32	37	27	32	25	29	28
38	36	28	39	23	40	29	29
37	32	32	53			29	22
38	27	31	41			29	23
33	35	26				29	31
35	27	29				29	33
30	23	33				29	29
32	32	30				29	27
46	27	48				29	23
42	24	33				29	26
36	33	38				29	30
37	31	36				29	40
37	26	41				29	38
22	28	30				29	53
25	21	36				29	31
28	27	36				29	43
25	15	25				29	36
35	25	46					41
29	19	50					28
30	19	39					37
27	22	32					33
31	20	43					37
25	18	28					42
41	18	25					52
30	21	45					50
31	22	43					43
30	18	35					47
22	35	43					46
39	20						52
39	23						45
42	28
32	22
41	25
33	17
34	22
	34
	22
	20
	21
	27
	19
	19
	23
	23
41	50	34	10	8	8	23	36		N
34.6341	25.54	34.5882	39.3	36.875	27.375	29	35.3611		mean
35	23.5	33	24.65	34.5	27.5	29	33.5		median
6.89477	6.57208	7.08442	7.74668	11.2305	6.61033	0	9.14066		SD
1.07678	0.929433	1.21497	2.44972	3.9706	2.3371	0	1.52344		SEM
<0.001	NA	<0.001	<0.001	0.00118	0.99724	0.51487	<0.001		Tukey p value (against GF)
Unit being measured: beta cells per larvae
Statistical Test: One way ANOVA with post hoc means testing (Tukey)
ANOVA values
F	11.47
DF	7
p	3.05e-12
