# Supplementary material for: A conserved bacterial protein induces pancreatic beta cell expansion during zebrafish development
Source: eLife. 2016 Dec 13;5:e20145. doi: 10.7554/eLife.20145 (PMC5154760; doi:10.7554/eLife.20145)
Supplement: Figure 3—source data 2. — DOI: http://dx.doi.org/10.7554/eLife.20145.010 [file elife-20145-fig3-data2.xlsx]

## Sheet: Sheet1
CV	GF	0-40% AS	40-60% AS	60-80%AS
40	22	36	35	37
22	29	24	34	31
38	21	29	27	40
37	26	26	29	37
37	28	31	27	37
22	21	29	43	43
25	27	34	34	42
28	15	37	34	24
25	25	26	43	21
35	19	32	27	21
29	19	23	30	25
30	22	28	28	34
27	20	19	30	26
31	18	28	31	30
25	18	26	39	34
41	21	36	26	41
30	22	27	32	39
31	18	35	35	35
30	35		43	38
22	20		25	25
39	23		25	37
39	28		38	47
42	22		27
32	25		25
41	17		29
33	22		27
34	34		17
	22
	20
	21
	27
	19
	19
	23
	23
27	35	18	27	22		N
32.037	22.6	29.2222	31.1111	33.8182		mean
31	22	28.5	30	36		median
6.30922	4.48002	5.02412	6.30222	7.44911		SD
1.21421	0.757262	1.1842	1.21286	1.58815		SEM
<1e-4	NA	0.00163	<1e-4	<1e-4		Tukey p value (against GF)
Unit being measured: beta cells per larvae
Statistical Test: One way ANOVA with post hoc means testing (Tukey)
ANOVA values
F	16.48
DF	4
p	7.46e-11
