# Supplementary material for: A conserved bacterial protein induces pancreatic beta cell expansion during zebrafish development
Source: eLife. 2016 Dec 13;5:e20145. doi: 10.7554/eLife.20145 (PMC5154760; doi:10.7554/eLife.20145)
Supplement: Figure 3—source data 3. — DOI: http://dx.doi.org/10.7554/eLife.20145.011 [file elife-20145-fig3-data3.xlsx]

## Sheet: Sheet1
CV	GF	GF + 10165
49	45	72
54	41	43
50	28	48
57	43	67
20	31	70
35	36	49
42	16	51
62	30	29
49	31	72
54	38	87
50	35	33
57	21	40
20	32	22
35	37	40
42	30	55
40	34	52
33	25	46
17	43	51
40	30	51
35	27	49
	13	58
	40	70
	32	54
	37	53
	50	44
	32	46
	26	41
	40	65
	36	36
	34	48
	32	27
		49
		43
		47
20	31	34		N
42.05	33.0645	50.2353		mean
42	32	49		median
12.9634	8.0039	14.0088		SD
2.89871	1.43754	2.40249		SEM
0.0267	NA	<0.001		Tukey p value (against GF)
Unit being measured: beta cells per larvae
Statistical Test: One way ANOVA with post hoc means testing (Tukey)
ANOVA values
F	16.91
DF	2
p	7.09e-07
