# Supplementary material for: A conserved bacterial protein induces pancreatic beta cell expansion during zebrafish development
Source: eLife. 2016 Dec 13;5:e20145. doi: 10.7554/eLife.20145 (PMC5154760; doi:10.7554/eLife.20145)
Supplement: Figure 4—source data 1. — Exact values of N, mean, median, SD, and SEM are reported in the source data file and are highlighted in yellow, magenta, blue, green, and cyan, respectively. DOI: http://dx.doi.org/10.7554/eLife.20145.014 [file elife-20145-fig4-data1.xlsx]

## Sheet: Sheet1
CV	GF	ΔbefA MA	ΔbefA CFS	WT CFS	ΔbefA MA + WT CFS	BefA	ΔbefA MA + BefA
49	45	28	37	75	45	45	42
54	41	31	27	56	45	31	56
50	28	29	26	56	45	32	45
57	43	33	11	42	51	35	33
20	31	34	36	41	45	45	42
35	36	32	34	35	42	37	28
42	16	22	44	52	57	19	45
40	30	45	43	70	43	27	40
33	30	54	21		63	49	42
17	34	56	33		46	41	37
40	25	43	22		58	25	43
35	43	50	34		63	40	42
75	30	43	40		47	49	56
56	27	47	36			40	45
56	13	43	29			41	33
42	40	38	37			44	42
41	32	39	22			67	28
35	37	33	25			43	45
52	50	23	58			30	40
70	32	33	31			42	42
	26	31	34			58	37
	40	32	31			55	43
	36	33	24			41	41
	34	18	26			58	45
	32	33				75	46
	27	39					55
	37	23					33
	33	33					39
	47	31					42
	26	32					47
	31	33
	36	18
	19	33
	11	39
	22	39
	21	38
	29	28
	28	38
	36	39
	38	29
	29
	25
	34
	54
	35
	42
	38
	50
	31
20	49	40	24	8	13	25	30		N
44.95	32.8571	34.875	31.7083	53.375	50	42.76	41.8		mean
42	32	33	32	54	46	41	42		median
14.5439	9.10815	8.59692	9.51191	14.0401	7.58288	12.9012	6.8249		SD
3.2521	1.30116	1.35929	1.94161	4.96393	2.10311	2.58023	1.24605		SEM
<0.001	NA	0.98026	0.99979	<0.001	<0.001	0.00209	0.00388		Tukey p value (against GF)
Unit being measured: beta cells per larvae
Statistical Test: One way ANOVA with post hoc means testing (Tukey)
ANOVA values
F	11.69
DF	7
p	1.91e-12
