# Supplementary material for: A conserved bacterial protein induces pancreatic beta cell expansion during zebrafish development
Source: eLife. 2016 Dec 13;5:e20145. doi: 10.7554/eLife.20145 (PMC5154760; doi:10.7554/eLife.20145)
Supplement: Figure 5—source data 1. — Exact values of N, mean, median, SD, and SEM are reported in the source data file and are highlighted in yellow, magenta, blue, green, and cyan, respectively. DOI: http://dx.doi.org/10.7554/eLife.20145.017 [file elife-20145-fig5-data1.xlsx]

## Sheet: Sheet1
CV	GF	BefA	ΔbefA CFS
66.6667	37.5	56.9231	40
77.2727	28.5714	63.8889	50
68.5714	25.9259	50	72.4138
88.8889	16.6667	51.8518	54.054
47.3684	16.6667	59.1837	45.4545
92.5	33.3333	65.1163	36
80.5556	25	51.0638	25.8621
70.2128	29.1667	39.6552	29.0323
78.0488	30.303	58.5714	58.8235
38.8889	21.0526	42.5926	29.0323
41.6667	7.69231	64.1509	29.1667
57.5	4.16667	43.1818	23.0769
70.5882	12.1212	45.6522	22.8571
42.4242	9.09091	36.5854	20.6897
58	45.4545	64.1026	21.0526
75.6098	38.0952	84.507	22.5806
71.7391	31.0345	76.9231	45.4545
50.9434	35.7143	86.1111	29.7872
64	33.3333	66.6667	30.303
59.0909	31.5789	85.3333	40.625
75.7576	31.0345	82.0896
77.7778	60	76.4706
50	42.5	66.6667
	25	64.1791
	48.6487	60.241
	42	56.25
	37.5
	30.7692
	45
	38.8889
	41.1765
	68.75
	42.8571
	21.875
	35.1351
	25.8065
	34.2105
	40
	60.5263
	48.7805
	54.902
	28.8889
	65.7143
	36.8421
	66.6667
	33.3333
	48.2759
	43.75
	27.6596
	41.1765
23	50	26	20		N
65.3944	35.6027	61.4599	36.3133		mean
68.5714	34.6728	62.0649	30.0451		median
15.0871	14.5988	14.3143	14.2871		SD
3.14588	2.06458	2.80727	3.19469		SEM
<1e-5	NA	<1e-5	0.998		Tukey p value (against GF)
Unit being measured: % EdU possitive beta cells per larvae
Statistical Test: One way ANOVA with post hoc means testing (Tukey)
ANOVA values
F	34.48
DF	3
p	5.68e-16
